# Supplementary material for: Synthesis, structures and characterisations of truly homoleptic acetonitrile Ln3+ complexes in solid state and in solution
Source: Royal Society of Chemistry journal article supplement (doi:10.1039/b822322j), 2009-01-01
Supplement: b822322j.pdf [file b822322j.pdf]

# **Synthesis, structures and characterisations of truly homoleptic acetonitrile $\text{Ln}^{3+}$ complexes in solid state and in solution<sup>†</sup>**

Gabriella Bodizs,<sup>a</sup> Ines Raabe,<sup>b</sup> Rosario Scopelliti,<sup>a</sup> Ingo Krossing,<sup>b</sup> Lothar Helm\*<sup>a</sup>

<sup>a</sup>Dr. Gabriella Bodizs, Dr. Rosario Scopelliti and Prof. Dr. Lothar Helm\*, Institut des Sciences et Ingénieries Chimiques, École Polytechnique Fédérale de Lausanne (EPFL), BCH, CH-1015, Lausanne, Switzerland, E-mail: lothar.helm@epfl.ch; Fax: +41 21 693 98 75; Tel: +41 21 693 98 76.

<sup>b</sup>Dr. Ines Raabe and Prof. Dr. Ingo Krossing, Albert-Ludwigs-Universität Freiburg, Institut für Anorganische und Analytische Chemie, Albertstr. 21, D-79104 Freiburg i. Br., Germany.

**Electronic supplementary information**

## IUPAC recommendations for NMR chemical shift measurements

In 2001 IUPAC recommended a unified scale for reporting the NMR chemical shifts of all nuclei relative to the  $^1\text{H}$  resonance of tetramethylsilane (TMS). The unified scale is designed to provide a precise ratio,  $\Xi$ , of the resonance frequency of a given nuclide to that of the primary reference, the  $^1\text{H}$  resonance of TMS in dilute solution (volume fraction,  $\varphi < 1\%$ ) in chloroform. Thus, the chemical shifts of the X nuclei can be determined on the unified (TMS based) scale just by measuring the resonance frequency of the sample and using a predetermined reference frequency for the nuclide in question. Therefore, only one (sample) tube is required and no reference substance needs to be added. The predetermined reference frequency is obtained by measuring the proton resonance of TMS under similar condition to the sample (with the same lock compound) in a single experiment for the spectrometer being used. Then, the frequency of the usual secondary reference for the nucleus X can be calculated using the predetermined value of TMS, Eq. S-1:

$$\nu_{X,ref} = (\nu_{TMS} \Xi_{ref}) / 100 \quad \text{S-1}$$

$\nu_{X,ref}$ : resonance frequency of a given nuclei (X) with respect to TMS

$\nu_{TMS}$ : proton resonance frequency of TMS

$\Xi_{ref}$ : frequency ratio between the secondary reference frequency and that of the  $^1\text{H}$  in TMS

The chemical shift of a given X nuclei in the sample can be easily derived from Eq. S- 2:

$$\delta_{X,sample} = \frac{\nu_{X,sample} - \nu_{X,ref}}{\nu_{X,ref}} 10^6 \quad \text{S-2}$$

$\nu_{X,sample}$ : resonance frequency of a given nuclei (X) in the sample

$\delta_{X,sample}$ : chemical shift of a given nuclei (X) in the sample with respect to TMS (in ppm)

If the lock substance in the sample solution is not the same as that of the reference solution, a lock correction must be applied, Eq. S-3:

$$\delta_{X,sample} = \delta_{X,observed} + (\delta_{sample}^{lock} - \delta_{reference}^{lock}) \quad \text{S-3}$$

Table S1. NMR properties of selected nuclei.

| nucleus          | spin I | natural abundance<br>(%) | $\Xi$<br>(%) | $\gamma$<br>( $10^7 \text{ rad s}^{-1} \text{ T}^{-1}$ ) | reference<br>compound      |
|------------------|--------|--------------------------|--------------|----------------------------------------------------------|----------------------------|
| $^1\text{H}$     | 1/2    | 99.989                   | 100          | 26.75                                                    | $\text{CH}_3\text{Si}$     |
| $^{13}\text{C}$  | 1/2    | 1.07                     | 25.145       | 6.73                                                     | $\text{CH}_3\text{Si}$     |
| $^{14}\text{N}$  | 1      | 99.63                    | 7.226        | 1.93                                                     | $\text{CCl}_3\text{F}$     |
| $^{19}\text{F}$  | 1/2    | 100                      | 94.094       | 25.16                                                    | $\text{CH}_3\text{NO}_2$   |
| $^{27}\text{Al}$ | 5/2    | 100                      | 26.057       | 6.98                                                     | $\text{Al}(\text{NO}_3)_3$ |

**Table S2** Crystallographic details of the partial structure determinations for [Nd(CH<sub>3</sub>CN)<sub>9</sub>][Al(pftb)<sub>4</sub>]<sub>3</sub>·4CH<sub>2</sub>Cl<sub>2</sub> (**1**·4CH<sub>2</sub>Cl<sub>2</sub>), [Gd(CH<sub>3</sub>CN)<sub>9</sub>][Al(pftb)<sub>4</sub>]<sub>3</sub>·3CH<sub>2</sub>Cl<sub>2</sub> (**3**·3CH<sub>2</sub>Cl<sub>2</sub>), and [Dy(CH<sub>3</sub>CN)<sub>9</sub>][Al(pftb)<sub>4</sub>]<sub>3</sub>·3CH<sub>2</sub>Cl<sub>2</sub>·CH<sub>3</sub>CN (**4**·3CH<sub>2</sub>Cl<sub>2</sub>·CH<sub>3</sub>CN).

|                                                      | <b>1</b> ·4CH <sub>2</sub> Cl <sub>2</sub>                                                                         | <b>3</b> ·3CH <sub>2</sub> Cl <sub>2</sub>                                                                         | <b>4</b> ·3CH <sub>2</sub> Cl <sub>2</sub> ·CH <sub>3</sub> CN                                                      |
|------------------------------------------------------|--------------------------------------------------------------------------------------------------------------------|--------------------------------------------------------------------------------------------------------------------|---------------------------------------------------------------------------------------------------------------------|
| Empirical formula                                    | C <sub>70</sub> H <sub>35</sub> Al <sub>3</sub> Cl <sub>8</sub> F <sub>108</sub> N <sub>9</sub> O <sub>12</sub> Nd | C <sub>69</sub> H <sub>33</sub> Al <sub>3</sub> Cl <sub>6</sub> F <sub>108</sub> N <sub>9</sub> O <sub>12</sub> Gd | C <sub>71</sub> H <sub>36</sub> Al <sub>3</sub> Cl <sub>6</sub> F <sub>108</sub> N <sub>10</sub> O <sub>12</sub> Dy |
| Fw                                                   | 3754.85                                                                                                            | 3682.81                                                                                                            | 3729.11                                                                                                             |
| crystal size [mm]                                    | 0.98 x 0.32 x 0.14                                                                                                 | 0.49 x 0.23 x 0.21                                                                                                 | 0.61 x 0.26 x 0.23                                                                                                  |
| crystal system                                       | orthorhombic                                                                                                       | orthorhombic                                                                                                       | orthorhombic                                                                                                        |
| space group                                          | <i>Pna</i> 2 <sub>1</sub>                                                                                          | <i>Pna</i> 2 <sub>1</sub>                                                                                          | <i>Pna</i> 2 <sub>1</sub>                                                                                           |
| <i>a</i> [Å]                                         | 28.308(10)                                                                                                         | 28.3168(18)                                                                                                        | 28.161(5)                                                                                                           |
| <i>b</i> [Å]                                         | 29.321(9)                                                                                                          | 29.3210(16)                                                                                                        | 29.301(5)                                                                                                           |
| <i>c</i> [Å]                                         | 15.203(3)                                                                                                          | 15.1241(10)                                                                                                        | 15.2811(16)                                                                                                         |
| $\alpha$ [°]                                         | 90                                                                                                                 | 90                                                                                                                 | 90                                                                                                                  |
| $\beta$ [°]                                          | 90                                                                                                                 | 90                                                                                                                 | 90                                                                                                                  |
| $\gamma$ [°]                                         | 90                                                                                                                 | 90                                                                                                                 | 90                                                                                                                  |
| <i>V</i> [nm <sup>3</sup> ]                          | 12.619(6)                                                                                                          | 12.557(2)                                                                                                          | 12.609(3)                                                                                                           |
| <i>Z</i>                                             | 4                                                                                                                  | 4                                                                                                                  | 4                                                                                                                   |
| $\rho_{\text{calc}}$ [Mg m <sup>-3</sup> ]           | 1.976                                                                                                              | 1.006                                                                                                              | 1.908                                                                                                               |
| $\mu$ [mm <sup>-1</sup> ]                            | 0.817                                                                                                              | 0.448                                                                                                              | 0.953                                                                                                               |
| abs. correction                                      | none                                                                                                               | none                                                                                                               | none                                                                                                                |
| F (000)                                              | 7284                                                                                                               | 3680                                                                                                               | 7012                                                                                                                |
| index range                                          | -29 ≤ <i>h</i> ≤ 29<br>-29 ≤ <i>k</i> ≤ 30<br>-15 ≤ <i>l</i> ≤ 15                                                  | -38 ≤ <i>h</i> ≤ 38<br>-39 ≤ <i>k</i> ≤ 39<br>-17 ≤ <i>l</i> ≤ 17                                                  | -32 ≤ <i>h</i> ≤ 32<br>-34 ≤ <i>k</i> ≤ 34<br>-17 ≤ <i>l</i> ≤ 17                                                   |
| Max 2 $\theta$                                       | 21.51                                                                                                              | 29.16                                                                                                              | 24.51                                                                                                               |
| <i>T</i> [K]                                         | 100(2)                                                                                                             | 100(2)                                                                                                             | 100(2)                                                                                                              |
| diffractometer type                                  | Bruker APEX II                                                                                                     | Bruker APEX II                                                                                                     | Bruker APEX II                                                                                                      |
| unique reflns. [ <i>I</i> > 2 $\sigma$ ( <i>I</i> )] | 7603                                                                                                               | 7377                                                                                                               | 13586                                                                                                               |
| Data / restraints / parameters                       | 7603 / 592 / 331                                                                                                   | 7737 / 454 / 193                                                                                                   | 13586 / 537 / 295                                                                                                   |
| GOOF                                                 | 1.274                                                                                                              | 0.770                                                                                                              | 1.527                                                                                                               |
| final R1 [ <i>I</i> > 2 $\sigma$ ( <i>I</i> )]       | 0.1578                                                                                                             | 0.1106                                                                                                             | 0.1561                                                                                                              |
| final wR2                                            | 0.3834                                                                                                             | 0.2683                                                                                                             | 0.4095                                                                                                              |
| largest residual peak [e Å <sup>-3</sup> ]           | 2.168                                                                                                              | 1.574                                                                                                              | 2.315                                                                                                               |
| largest residual hole [e Å <sup>-3</sup> ]           | -0.910                                                                                                             | -1.558                                                                                                             | -1.407                                                                                                              |

**Table S3** Comparison of the IR and Raman spectra of **1**, **2**, **3**, **4** and **5** with those of free CH<sub>3</sub>CN and of the [Al(pftb)<sub>4</sub>]<sup>-</sup> anion in [NEt<sub>4</sub>][Al(pftb)<sub>4</sub>] and Li[Al(pftb)<sub>4</sub>]. Bands assigned to the [Ln(CH<sub>3</sub>CN)<sub>n</sub>]<sup>3+</sup> cations are marked in bold (vw = very weak, w = weak, mw = medium weak, m = medium, ms = medium strong, s = strong, vs = very strong, sh = shoulder).

| <b>1</b>            |                | <b>2</b>        |                | <b>3</b>        |                | <b>4</b>    |                | <b>5</b>            |                | [Al(pftb) <sub>4</sub> ] <sup>-</sup> in<br>[NEt <sub>4</sub> ][Al(pftb) <sub>4</sub> ] <sup>40</sup> |             | [Al(pftb) <sub>4</sub> ] <sup>-</sup> in<br>Li[Al(pftb) <sub>4</sub> ] <sup>40</sup> |             | CH <sub>3</sub> CN |                     | assignment        |
|---------------------|----------------|-----------------|----------------|-----------------|----------------|-------------|----------------|---------------------|----------------|-------------------------------------------------------------------------------------------------------|-------------|--------------------------------------------------------------------------------------|-------------|--------------------|---------------------|-------------------|
| IR                  | Raman          | IR              | Raman          | IR              | Raman          | IR          | Raman          | IR                  | Raman          | IR                                                                                                    | Raman       | IR                                                                                   | Raman       | IR                 | Raman               |                   |
| -                   | 233<br>(w)     | -               | 234<br>(w)     | -               | 236<br>(w)     | -           | 233<br>(w)     | -                   | 235<br>(w)     | 228 (w)                                                                                               | 234<br>(w)  | -                                                                                    | 234<br>(mw) | -                  | -                   | C-C-              |
| 289<br>(w)          | 288<br>(w)     | 283<br>(w)      | 288<br>(w)     | 283<br>(w)      | 291<br>(w)     | 287<br>(w)  | 287<br>(w)     | 289<br>(w)          | 291<br>(w)     | 285 (mw)                                                                                              | 289<br>(w)  | 289<br>(w)                                                                           | 297<br>(w)  | -                  | -                   | C-C               |
| 315<br>(m)          | 323<br>(w)     | 315<br>(w)      | 322<br>(m)     | 315<br>(w)      | 324<br>(ms)    | 315<br>(m)  | 323<br>(w)     | 315<br>(m)          | 324<br>(m)     | 316 (m)                                                                                               | 323<br>(ms) | -                                                                                    | 316<br>(w)  | -                  | -                   | C-C, Al-O         |
| 327<br>(w)          | -              | -               | -              | -               | -              | 331<br>(vw) | -              | 328<br>(w)          | -              | 331 (w)                                                                                               | -           | 326<br>(w)                                                                           | 327<br>(m)  | -                  | -                   | C-C, C-F,<br>Al-O |
| <b>355<br/>(vw)</b> | -              | -               | -              | -               | -              | -           | -              | <b>355<br/>(vw)</b> | -              | -                                                                                                     | -           | -                                                                                    | -           | -                  | <b>383<br/>(mw)</b> | <b>C-C-N</b>      |
| -                   | 368<br>(w)     | -               | 368<br>(w)     | -               | 370<br>(w)     | 368<br>(w)  | 368<br>(w)     | 370<br>(w)          | 370<br>(w)     | 367 (mw)                                                                                              | 368<br>(w)  | 369<br>(w)                                                                           | 363<br>(w)  | -                  | -                   | C-C, C-F,<br>Al-O |
| 376<br>(w)          | -              | 376<br>(w)      | -              | 376<br>(w)      | -              | 380<br>(w)  | -              | 375<br>(w)          | -              | 377 (mw)                                                                                              | -           | -                                                                                    | 390<br>(w)  | -                  | -                   | C-C, C-O          |
| 399<br>(m)          | 408<br>(w)     | -               | 409<br>(mw)    | 404<br>(w)      | 417<br>(m)     | 417<br>(vw) | 414<br>(w)     | 407<br>(w)          | 418<br>(m)     | -                                                                                                     | -           | -                                                                                    | -           | -                  | -                   | C-C-N             |
| 447<br>(ms)         | -              | 447<br>(m)      | -              | 447<br>(mw)     | -              | 449<br>(ms) | -              | 448<br>(ms)         | -              | 446 (ms)                                                                                              | -           | -                                                                                    | -           | -                  | -                   | C-C, C-O          |
| -                   | -              | -               | -              | -               | -              | -           | -              | -                   | -              | -                                                                                                     | -           | 464<br>(m)                                                                           | -           | -                  | -                   | -                 |
| 537<br>(ms)         | 538<br>(w)     | 537<br>(mw)     | 538<br>(m)     | 537<br>(w)      | 540<br>(w)     | 537<br>(ms) | 539<br>(w)     | 537<br>(ms)         | 549<br>(w)     | 537 (m)                                                                                               | 538<br>(w)  | 539<br>(m)                                                                           | 539<br>(mw) | -                  | -                   | C-C, C-O          |
| -                   | -              | -               | -              | -               | -              | -           | -              | -                   | -              | -                                                                                                     | -           | 546<br>(mw)                                                                          | -           | -                  | -                   | -                 |
| 561<br>(ms)         | 562<br>(w)     | 561<br>(w)      | 561<br>(mw)    | 561<br>(vw)     | 563<br>(w)     | 561<br>(ms) | 562<br>(w)     | 561<br>(ms)         | 563<br>(w)     | 562 (mw)                                                                                              | 563<br>(w)  | 562<br>(mw)                                                                          | -           | -                  | -                   | Al-O, C-C         |
| 572<br>(m)          | 572<br>(sh, w) | 572<br>(vw, sh) | 572<br>(sh, w) | 572<br>(vw, sh) | 571<br>(sh, w) | 572<br>(mw) | 572<br>(sh, w) | 572<br>(m)          | 572<br>(sh, w) | 571<br>(w)                                                                                            | -           | 572+582<br>(m)                                                                       | 573<br>(mw) | -                  | -                   | Al-O, C-C         |

**Table 4** continued Comparison of the IR and Raman spectra of **1**, **2**, **3**, **4** and **5** with those of free CH<sub>3</sub>CN and of the [Al(pftb)<sub>4</sub>]<sup>-</sup> anion in [NEt<sub>4</sub>][Al(pftb)<sub>4</sub>] and Li[Al(pftb)<sub>4</sub>]. Bands assigned to the [Ln(CH<sub>3</sub>CN)<sub>n</sub>]<sup>3+</sup> cations are marked in bold (vw = very weak, w = weak, mw = medium weak, m = medium, ms = medium strong, s = strong, vs = very strong, sh = shoulder).

| <b>1</b>           |                    | <b>2</b>          |                   | <b>3</b>           |                   | <b>4</b>           |                    | <b>5</b>     |                   | [Al(pftb) <sub>4</sub> ] <sup>-</sup> in<br>[NEt <sub>4</sub> ][Al(pftb) <sub>4</sub> ] <sup>40</sup> |            | [Al(pftb) <sub>4</sub> ] <sup>-</sup> in<br>Li[Al(pftb) <sub>4</sub> ] <sup>40</sup> |              | CH <sub>3</sub> CN |                   | assignment    |
|--------------------|--------------------|-------------------|-------------------|--------------------|-------------------|--------------------|--------------------|--------------|-------------------|-------------------------------------------------------------------------------------------------------|------------|--------------------------------------------------------------------------------------|--------------|--------------------|-------------------|---------------|
| IR                 | Raman              | IR                | Raman             | IR                 | Raman             | IR                 | Raman              | IR           | Raman             | IR                                                                                                    | Raman      | IR                                                                                   | Raman        | IR                 | Raman             |               |
| 727<br>(ms)        | -                  | 727<br>(s)        | -                 | 727<br>(ms)        | -                 | 727<br>(ms)        | -                  | 727<br>(ms)  | -                 | 727<br>(s)                                                                                            | -          | 726<br>(s)                                                                           | 730<br>(s)   | -                  | -                 | C-C, C-O      |
| -                  | 746<br>(ms)        | -                 | 746<br>(s)        | -                  | 748<br>(s)        | -                  | 746<br>(ms)        | -            | 748<br>(ms)       | -                                                                                                     | 747 (ms)   | 740<br>(ms)                                                                          | 745<br>(s)   | -                  | -                 | -             |
| 755<br>(vw)        | -                  | 756<br>(vw)       | -                 | 756<br>(vw)        | -                 | 756<br>(vw)        | -                  | 756<br>(vw)  | -                 | 756<br>(mw)                                                                                           | -          | 756+760<br>(m)                                                                       | -            | -                  | -                 | C-C, C-O      |
| -                  | 798<br>(ms)        | -                 | 797<br>(s)        | -                  | 799<br>(s)        | -                  | 798<br>(ms)        | -            | 799<br>(ms)       | -                                                                                                     | 798<br>(s) | 798<br>(m)                                                                           | 801<br>(w)   | -                  | -                 | -             |
| 832<br>(mw)        | -                  | 832<br>(w)        | -                 | 833<br>(w)         | -                 | 832<br>(w)         | -                  | 832<br>(mw)  | -                 | 833 (m)                                                                                               | 834<br>(w) | 844<br>(ms)                                                                          | 843<br>(w)   | -                  | -                 | Al-O, C-<br>C |
| -                  | -                  | -                 | -                 | -                  | -                 | -                  | -                  | -            | -                 | -                                                                                                     | -          | 863<br>(ms)                                                                          | -            | -                  | -                 | Al-O, C-<br>C |
| <b>933</b><br>(vw) | <b>936</b><br>(vw) | <b>935</b><br>(w) | <b>938</b><br>(w) | <b>934</b><br>(vw) | <b>942</b><br>(w) | <b>937</b><br>(vw) | <b>938</b><br>(vw) | -            | <b>942</b><br>(w) | -                                                                                                     | -          | 936<br>(ms)                                                                          | -            | <b>918</b><br>(vw) | <b>922</b><br>(m) | C-C           |
| -                  | -                  | -                 | -                 | -                  | -                 | -                  | -                  | -            | -                 | -                                                                                                     | -          | 964<br>(vs)                                                                          | -            | -                  | -                 | C-C           |
| 972<br>(vs)        | 978<br>(w)         | 972<br>(vs)       | 973<br>(vw)       | 972<br>(vs)        | 977<br>(vw)       | 972<br>(vs)        | -                  | 972<br>(vs)  | 977<br>(w)        | 973<br>(s)                                                                                            | 978 (mw)   | 976<br>(vs)                                                                          | 978<br>(w)   | -                  | -                 | C-C, C-F      |
| -                  | -                  | -                 | -                 | -                  | -                 | -                  | -                  | -            | -                 | -                                                                                                     | -          | -                                                                                    | -            | <b>1039</b><br>(w) | -                 | <b>H-C-N</b>  |
| -                  | -                  | -                 | 1135<br>(vw)      | -                  | -                 | -                  | -                  | -            | -                 | -                                                                                                     | 1139 (mw)  | -                                                                                    | 1113<br>(w)  | -                  | -                 | C-C, C-F      |
| 1168<br>(m)        | -                  | 1170<br>(ms)      | -                 | 1171<br>(m)        | -                 | 1171<br>(m)        | -                  | -            | -                 | -                                                                                                     | 1173 (mw)  | 1184<br>(ms)                                                                         | 1171<br>(w)  | -                  | -                 | C-C, C-F      |
| 1218<br>(vs)       | -                  | 1216<br>(vs)      | 1218<br>(vw)      | 1218<br>(vs)       | -                 | 1217<br>(vs)       | -                  | 1217<br>(vs) | -                 | 1217 (vs)                                                                                             | -          | 1225 (vs)                                                                            | 1214<br>(mw) | -                  | -                 | C-C, C-F      |

**Table 4 continued** Comparison of the IR and Raman spectra of **1**, **2**, **3**, **4** and **5** with those of free CH<sub>3</sub>CN and of of the [Al(pftb)<sub>4</sub>]<sup>-</sup> anion in [NEt<sub>4</sub>][Al(pftb)<sub>4</sub>] and Li[Al(pftb)<sub>4</sub>]. Bands assigned to the [Ln(CH<sub>3</sub>CN)<sub>n</sub>]<sup>3+</sup> cations are marked in bold (vw = very weak, w = weak, mw = medium weak, m = medium, ms = medium strong, s = strong, vs = very strong, sh = shoulder).

| <b>1</b>            |                     | <b>2</b>            |                     | <b>3</b>            |                     | <b>4</b>            |                     | <b>5</b>            |                     | [Al(pftb) <sub>4</sub> ] <sup>-</sup> in [NEt <sub>4</sub> ][Al(pftb) <sub>4</sub> ] <sup>40</sup> |              | [Al(pftb) <sub>4</sub> ] <sup>-</sup> in Li[Al(pftb) <sub>4</sub> ] <sup>40</sup> |              | CH <sub>3</sub> CN  |                     | assignment                    |
|---------------------|---------------------|---------------------|---------------------|---------------------|---------------------|---------------------|---------------------|---------------------|---------------------|----------------------------------------------------------------------------------------------------|--------------|-----------------------------------------------------------------------------------|--------------|---------------------|---------------------|-------------------------------|
| IR                  | Raman               | IR                                                                                                 | Raman        | IR                                                                                | Raman        | IR                  | Raman               |                               |
| 1244<br>(vs)        | 1245<br>(w)         | 1244<br>(vs)        | 1244<br>(w)         | 1245<br>(vs)        | -                   | 1245<br>(vs)        | -                   | 1245<br>(s)         | -                   | 1240<br>(s)                                                                                        | 1235<br>(mw) | 1243<br>(s)                                                                       | 1250<br>(mw) | -                   | -                   | C-C, C-F                      |
| -                   | -                   | -                   | -                   | -                   | -                   | -                   | -                   | -                   | -                   | 1245<br>(s)                                                                                        | -            | -                                                                                 | -            | -                   | -                   | C-C, C-F                      |
| 1275<br>(s)         | 1274<br>(w)         | 1275<br>(s)         | 1273<br>(w)         | 1275<br>(s)         | 1276<br>(w)         | 1275<br>(vs)        | 1271<br>(mw)        | 1275<br>(s)         | 1276<br>(w)         | 1274<br>(vs)                                                                                       | 1274 (mw)    | 1270<br>(s)                                                                       | 1281<br>(mw) | -                   | -                   | C-C, C-F                      |
| 1299<br>(ms)        | -                   | 1299<br>(ms)        | 1307<br>(w)         | 1299<br>(ms)        | 1308<br>(w)         | 1299<br>(s)         | 1308<br>(w)         | 1299<br>(ms)        | 1308<br>(w)         | 1298 (s)                                                                                           | 1300 (m)     | 1297<br>(s)                                                                       | -            | -                   | -                   | C-C, C-F                      |
| 1353<br>(m)         | -                   | 1353<br>(ms)                                                                                       | -            | 1353<br>(ms)                                                                      | 1337<br>(mw) | -                   | -                   | C-C, C-F                      |
| -                   | <b>1377</b><br>(m)  | <b>1377</b><br>(vw) | <b>1377</b><br>(m)  | -                   | <b>1379</b><br>(m)  | <b>1376</b><br>(vw) | <b>1377</b><br>(m)  | -                   | <b>1379</b><br>(m)  | -                                                                                                  | -            | -                                                                                 | -            | <b>1376</b><br>(ms) | <b>1377</b><br>(w)  | <b>H-C-H,</b><br><b>H-C-N</b> |
| -                   | -                   | -                   | <b>1416</b><br>(vw) | -                   | <b>1420</b><br>(vw) | -                   | -                   | -                   | <b>1420</b><br>(vw) | -                                                                                                  | -            | -                                                                                 | -            | <b>1444</b><br>(ms) | <b>1448</b><br>(w)  | <b>H-C-H</b>                  |
| <b>2281</b><br>(m)  | <b>2284</b><br>(vs) | <b>2283</b><br>(m)  | <b>2285</b><br>(vs) | <b>2283</b><br>(mw) | <b>2290</b><br>(vs) | <b>2284</b><br>(m)  | <b>2286</b><br>(vs) | <b>2286</b><br>(m)  | <b>2290</b><br>(vs) | -                                                                                                  | -            | -                                                                                 | -            | <b>2253</b><br>(vs) | <b>2255</b><br>(s)  | C-N                           |
| <b>2310</b><br>(w)  | <b>2312</b><br>(ms) | <b>2311</b><br>(w)  | <b>2313</b><br>(s)  | <b>2312</b><br>(vw) | <b>2318</b><br>(s)  | <b>2313</b><br>(w)  | <b>2314</b><br>(ms) | <b>2314</b><br>(w)  | <b>2318</b><br>(ms) | -                                                                                                  | -            | -                                                                                 | -            | <b>2292</b><br>(mw) | <b>2295</b><br>(w)  | C-N                           |
| <b>2955</b><br>(vw) | <b>2956</b><br>(s)  | <b>2956</b><br>(vw) | <b>2956</b><br>(vs) | <b>2955</b><br>(vw) | <b>2957</b><br>(vs) | <b>2955</b><br>(vw) | <b>2955</b><br>(w)  | <b>2955</b><br>(vw) | -                   | -                                                                                                  | -            | -                                                                                 | -            | <b>2945</b><br>(vw) | <b>2945</b><br>(vs) | C-H                           |
| -                   | <b>3022</b><br>(mw) | -                   | <b>3021</b><br>(w)  | -                   | <b>3023</b><br>(mw) | -                   | <b>3024</b><br>(vs) | -                   | <b>3023</b><br>(vs) | -                                                                                                  | -            | -                                                                                 | -            | <b>3002</b><br>(vw) | <b>3004</b><br>(w)  | C-H                           |

**Table S5.**  $^{19}\text{F}$ -NMR data measured on  $[\text{Nd}(\text{CH}_3\text{CN})_9][\text{Al}(\text{OC}(\text{CF}_3)_3)_4]_3$  **1** at 376 MHz, 25°C in  $\text{CH}_3\text{CN}$  (5 mm NMR tubes).

| Sample                                                                                  | [Ln]<br>(mmol kg <sup>-1</sup> ) | [anion]/[Ln] | $\Delta\nu_{1/2}$<br>(Hz) | $1/T_{2\text{obs}}$<br>(s <sup>-1</sup> ) |
|-----------------------------------------------------------------------------------------|----------------------------------|--------------|---------------------------|-------------------------------------------|
| $[\text{Nd}(\text{CH}_3\text{CN})_9][\text{Al}(\text{OC}(\text{CF}_3)_3)_4]_3$ <b>1</b> | 16.00                            | 3            | 6.3                       | 20                                        |
|                                                                                         |                                  | 6            | 8.0                       | 25                                        |
|                                                                                         |                                  | 9            | 6.3                       | 20                                        |

**Table S6.**  $^{19}\text{F}$ -NMR data measured on  $\text{Eu}(\text{CH}_3\text{CN})_3(\text{CF}_3\text{SO}_3)_2$  and  $[\text{Eu}(\text{CH}_3\text{CN})_9][\text{Al}(\text{OC}(\text{CF}_3)_3)_4]_2$  **2a** at 376 MHz, 25°C in  $\text{CH}_3\text{CN}$  (5 mm NMR tubes).

| Sample                                                                                   | [Ln]<br>(mmol kg <sup>-1</sup> ) | [anion]/[Ln] | $\Delta\nu_{1/2}$<br>(Hz) | $1/T_{2\text{obs}}$<br>(s <sup>-1</sup> ) |
|------------------------------------------------------------------------------------------|----------------------------------|--------------|---------------------------|-------------------------------------------|
| $\text{Eu}(\text{CH}_3\text{CN})_3(\text{CF}_3\text{SO}_3)_2$                            | 9.43                             | 3            | 316                       | 991                                       |
|                                                                                          |                                  | 6            | 282                       | 887                                       |
|                                                                                          |                                  | 9            | 253                       | 795                                       |
| $[\text{Eu}(\text{CH}_3\text{CN})_9][\text{Al}(\text{OC}(\text{CF}_3)_3)_4]_2$ <b>2a</b> | 10.08                            | 3            | 11.4                      | 36                                        |
|                                                                                          |                                  | 6            | 11.3                      | 36                                        |
|                                                                                          |                                  | 9            | 10.4                      | 33                                        |

**Table S7.**  $^{19}\text{F}$ -NMR data measured on  $\text{Gd}(\text{CH}_3\text{CN})_3(\text{CF}_3\text{SO}_3)_3$  and  $[\text{Gd}(\text{CH}_3\text{CN})_9][\text{Al}(\text{OC}(\text{CF}_3)_3)_4]_3$  **3** at 376 MHz, 25°C in  $\text{CH}_3\text{CN}$  (5 mm NMR tubes).

| Sample                                                                                  | [Ln]<br>(mmol kg <sup>-1</sup> ) | [anion]/[Ln] | $\Delta\nu_{1/2}$<br>(Hz) | $1/T_{2\text{obs}}$<br>(s <sup>-1</sup> ) |
|-----------------------------------------------------------------------------------------|----------------------------------|--------------|---------------------------|-------------------------------------------|
| $\text{Gd}(\text{CH}_3\text{CN})_3(\text{CF}_3\text{SO}_3)_3$                           | 12.51                            | 3            | 817                       | 2568                                      |
|                                                                                         |                                  | 6            | 497                       | 1561                                      |
|                                                                                         |                                  | 9            | 385                       | 1210                                      |
| $[\text{Gd}(\text{CH}_3\text{CN})_9][\text{Al}(\text{OC}(\text{CF}_3)_3)_4]_3$ <b>3</b> | 13.37                            | 3            | 46                        | 143                                       |
|                                                                                         |                                  | 6            | 51                        | 159                                       |
|                                                                                         |                                  | 9            | 53                        | 167                                       |
|                                                                                         | 8.56                             | 3            | 45                        | 140                                       |
|                                                                                         |                                  | 6            | 50                        | 158                                       |
|                                                                                         |                                  | 9            | 45                        | 142                                       |
| 1.35                                                                                    | 3                                | 26           | 82                        |                                           |



**Table S8.**  $^{19}\text{F}$ -NMR data measured on  $[\text{Dy}(\text{CH}_3\text{CN})_9][\text{Al}(\text{OC}(\text{CF}_3)_3)_4]_3$  **4** at 376 MHz, 25°C in  $\text{CH}_3\text{CN}$  (5 mm NMR tubes).

| Sample                                                                                  | [Ln]<br>(mmol kg <sup>-1</sup> ) | [anion]/[Ln] | $\Delta\nu_{1/2}$<br>(Hz) | $1/T_{2\text{obs}}$<br>(s <sup>-1</sup> ) |
|-----------------------------------------------------------------------------------------|----------------------------------|--------------|---------------------------|-------------------------------------------|
| $[\text{Dy}(\text{CH}_3\text{CN})_9][\text{Al}(\text{OC}(\text{CF}_3)_3)_4]_3$ <b>4</b> | 78.20                            | 3            | 6.9                       | 22                                        |
|                                                                                         |                                  | 3            | 6.9                       | 22                                        |
|                                                                                         | 44.67                            | 6            | 6.5                       | 20                                        |
|                                                                                         |                                  | 9            | 8.5                       | 27                                        |
|                                                                                         | 27.87                            | 3            | 5.7                       | 18                                        |

**Table S9.**  $^{19}\text{F}$ -NMR data measured on  $[\text{Tm}(\text{CH}_3\text{CN})_8][\text{Al}(\text{OC}(\text{CF}_3)_3)_4]_3$  **5** at 376 MHz, 25°C in  $\text{CH}_3\text{CN}$  (5 mm NMR tubes).

| Sample                                                                                  | [Ln]<br>(mmol kg <sup>-1</sup> ) | [anion]/[Ln] | $\Delta\nu_{1/2}$<br>(Hz) | $1/T_{2\text{obs}}$<br>(s <sup>-1</sup> ) |
|-----------------------------------------------------------------------------------------|----------------------------------|--------------|---------------------------|-------------------------------------------|
| $[\text{Tm}(\text{CH}_3\text{CN})_8][\text{Al}(\text{OC}(\text{CF}_3)_3)_4]_3$ <b>5</b> | 130                              | 3            | 6.8                       | 21                                        |
|                                                                                         |                                  | 3            | 5.9                       | 18                                        |
|                                                                                         | 70.72                            | 6            | 8.0                       | 25                                        |
|                                                                                         |                                  | 9            | 8.2                       | 26                                        |
|                                                                                         | 18.11                            | 3            | 4.8                       | 15                                        |
